# Supplementary material for: Mitophagy in Alzheimer’s Disease: A Bibliometric Analysis from 2007 to 2022
Source: PubMed Central journal article supplement — J Alzheimers Dis Rep. 2024 Jan 29;8(1):101–28. doi: 10.3233/ADR-230139 (PMC10836605; doi:10.3233/adr-230139), 2024-01-29
Supplement: adr-8-adr230139-s001.pdf [file adr-8-adr230139-s001.pdf]

# Supplementary Material

## Mitophagy in Alzheimer's Disease: A Bibliometric Analysis from 2007 to 2022

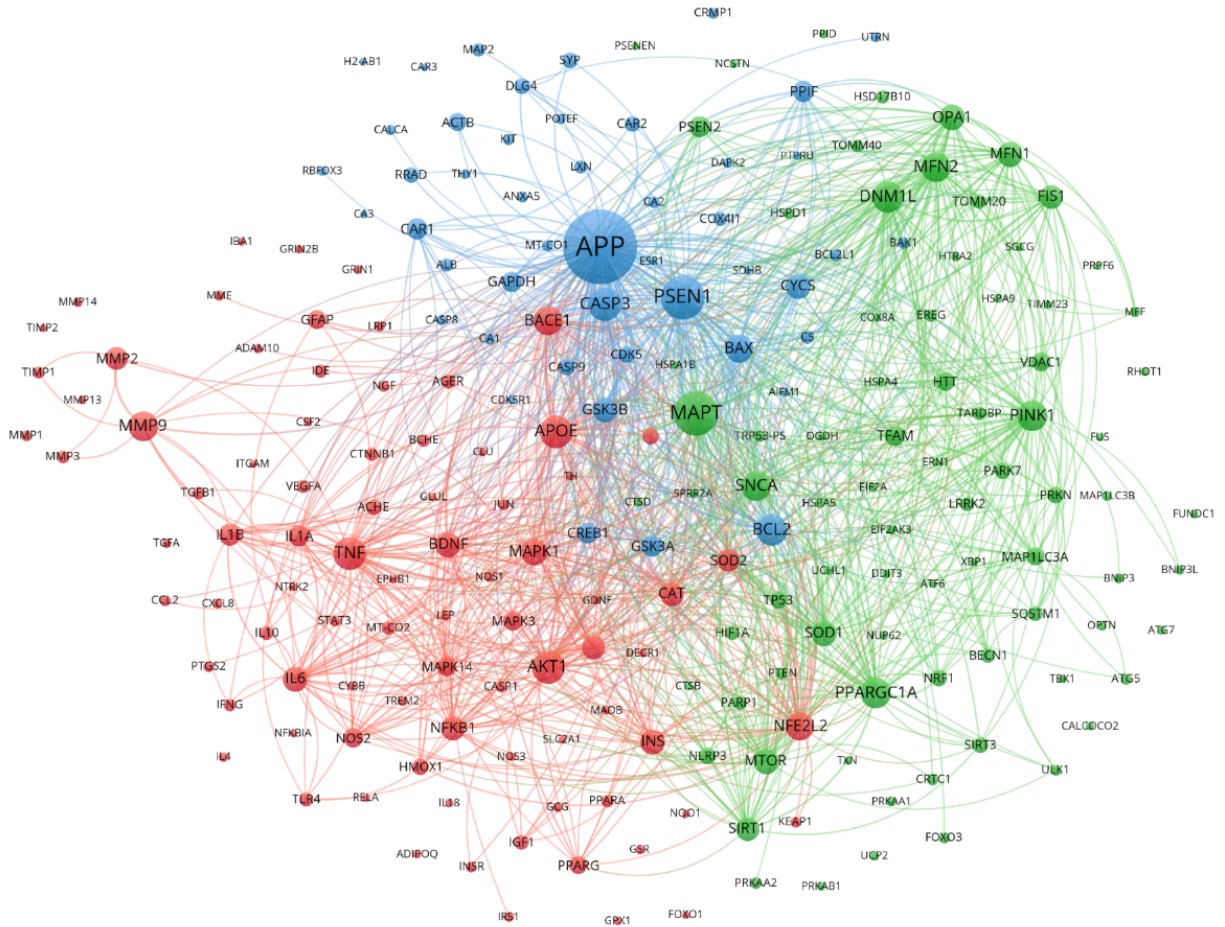

**Supplementary Figure 1. A network of all targets from the abstract of 5,146 publications.** This network consists of three clusters. Targets of each cluster represent the gene or protein names appearing in the abstract.

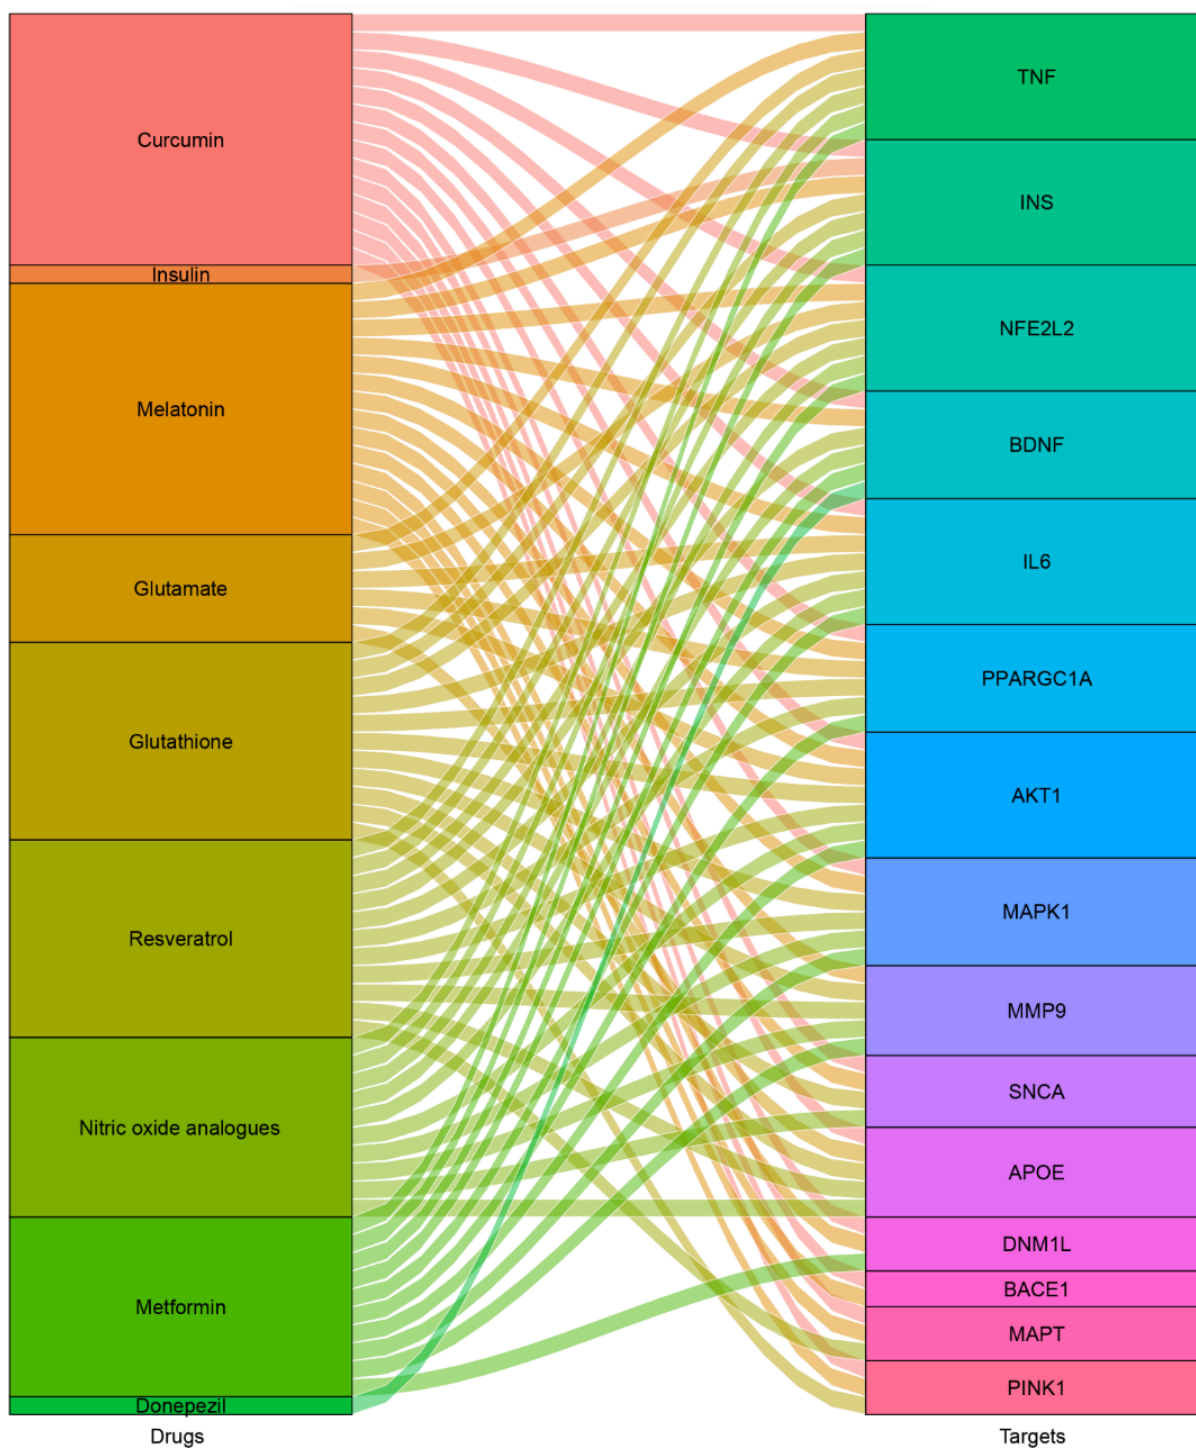

**Supplementary Figure 2. Sankey diagram of all drugs/molecules and corresponding targets.** These drugs were extracted from the retrieved 5,146 publications. The drug-target relationships were obtained from PubChem of the National Library of Medicine.

**Supplementary Table 1. Search strategy in the study.**

| Item | Search strategy criteria                                                                                                                                                                                                                                                                                                                                                                                                                                                                                                                                                                                                                                                                                                                                                                                                                                                                                                                                                                                                                                                                                                                                                                                                                                                                                                                                                                                                                                                                                                                                                                                                                                                                                                                                                                                                                                                                                                                                                                                                                                                                                                                                                                                                                  |
|------|-------------------------------------------------------------------------------------------------------------------------------------------------------------------------------------------------------------------------------------------------------------------------------------------------------------------------------------------------------------------------------------------------------------------------------------------------------------------------------------------------------------------------------------------------------------------------------------------------------------------------------------------------------------------------------------------------------------------------------------------------------------------------------------------------------------------------------------------------------------------------------------------------------------------------------------------------------------------------------------------------------------------------------------------------------------------------------------------------------------------------------------------------------------------------------------------------------------------------------------------------------------------------------------------------------------------------------------------------------------------------------------------------------------------------------------------------------------------------------------------------------------------------------------------------------------------------------------------------------------------------------------------------------------------------------------------------------------------------------------------------------------------------------------------------------------------------------------------------------------------------------------------------------------------------------------------------------------------------------------------------------------------------------------------------------------------------------------------------------------------------------------------------------------------------------------------------------------------------------------------|
| #1   | Ts = ("alzheimer's disease" OR "alzheimer's diseases" OR "alzheimer disease" OR "alzheimer diseases" OR "alzheimer associated" OR "alzheimer beta protein" OR "alzheimer dementia" OR "alzheimer's dementia" OR "alzheimer dementias" OR "alzheimer type dementia" OR "Alzheimer amyloid" OR "AD" OR "ATD" OR "Alzheimer" OR "FAD" OR "familial alzheimer disease" OR "familial alzheimer diseases" OR "alzheimer syndrome" OR "alzheimer sclerosis" OR "presenile dementia" OR "senile dementia" OR "senile degenerative" OR "degenerative dementia")                                                                                                                                                                                                                                                                                                                                                                                                                                                                                                                                                                                                                                                                                                                                                                                                                                                                                                                                                                                                                                                                                                                                                                                                                                                                                                                                                                                                                                                                                                                                                                                                                                                                                    |
| #2   | Ts = ("mitochondria autophagy" OR "mitochondrion autophagy" OR "mitochondrial autophagy" OR "mitochondrion autophagocytosis" OR "mitochondria autophagocytosis" OR "mitochondrial autophagocytosis" OR "mitophagy" OR "mitochondrial turnover" OR "transmitophagy" OR "mitochondrion transport" OR "mitochondria transport" OR "mitochondrial transport" OR "mitochondria transfer" OR "mitochondrion transfer" OR "mitochondrial transfer" OR "transcellular mitophagy" OR "transmitotic" OR "transmitochondrial" OR "transmitochondrion" OR "transmitochondria" OR "mitochondrion transplant" OR "mitochondria transplant" OR "mitochondrial transplant" OR "mitochondrial swelling" OR "mitochondrial hypertrophy" OR "mitochondrial hypertrophies" OR "megamitochondria" OR "megamitochondrias" OR "giant mitochondria" OR "giant mitochondria" OR "mitochondrial damage" OR "mitochondria damage" OR "mitochondrion damage" OR "mitochondrial dynamic" OR "mitochondrial dynamics" OR "mitochondrial dysfunction" OR "mitochondria dysfunction" OR "mitochondrial biogenesis" OR "mitochondrial homeostasis" OR "mitophagy-related genes" OR "mitochondria apoptosis" OR "mitochondrion apoptosis" OR "mitochondrial apoptosis" OR "mitochondria fragment" OR "mitochondrial fragment" OR "mitochondria fragmentation" OR "mitochondrial fragmentation" OR "mitochondrial fissions" OR "mitochondrial fission" OR "mitochondrial fusion" OR "mitochondrial fusions" OR "mitochondria unfold protein" OR "mitochondrial unfold protein" OR "mitochondrial plasticity" OR "mitochondrial fitness" OR "mitochondrial metabolism" OR "mitochondrial deregulation" OR "mitochondrion deregulation" OR "mitochondria deregulation" OR "mitochondria ROS" OR "mitochondrial ROS" OR "mitochondrial permeability" OR "mitochondrial oxidative" OR "mitochondria-mediated apoptosis" OR "mitochondria cargo" OR "mitochondrial cargo" OR "mitochondria ubiquitination" OR "mitochondrial ubiquitination" OR "mitochondria ubiquitin" OR "mitochondrial ubiquitin" OR "mitochondrial morphology" OR "mitochondrial injury" OR "mitochondria injury" OR "mitochondrion injury" OR "phosphorylation deficiency" OR "phosphorylation deficiency") |
| #3   | #1 AND #2                                                                                                                                                                                                                                                                                                                                                                                                                                                                                                                                                                                                                                                                                                                                                                                                                                                                                                                                                                                                                                                                                                                                                                                                                                                                                                                                                                                                                                                                                                                                                                                                                                                                                                                                                                                                                                                                                                                                                                                                                                                                                                                                                                                                                                 |

Ts, Topics

**Supplementary Table 2. Top 10 most frequently occurring diseases in each cluster.**

| Ranks            | Terms                                                             | Frequency | Weight |
|------------------|-------------------------------------------------------------------|-----------|--------|
| <i>Cluster 1</i> |                                                                   |           |        |
| 1                | Neoplasms                                                         | 755       | 15,078 |
| 2                | Diabetes mellitus                                                 | 584       | 12,750 |
| 3                | Stroke                                                            | 408       | 9,875  |
| 4                | Ischemia                                                          | 389       | 9,820  |
| 5                | Glucose metabolism disorders                                      | 350       | 9,144  |
| 6                | Obesity                                                           | 307       | 7,449  |
| 7                | Cardiovascular diseases                                           | 274       | 6,625  |
| 8                | Hypertension                                                      | 244       | 6,204  |
| 9                | Brain injuries                                                    | 224       | 6,286  |
| 10               | Brain injuries, traumatic                                         | 216       | 5,767  |
| <i>Cluster 2</i> |                                                                   |           |        |
| 1                | Parkinson's disease                                               | 1,163     | 21,173 |
| 2                | Huntington's disease                                              | 528       | 11,591 |
| 3                | Neuroblastoma                                                     | 456       | 10,126 |
| 4                | Amyotrophic lateral sclerosis                                     | 405       | 9,252  |
| 5                | Ophthalmoplegic neuromuscular disorder with abnormal mitochondria | 398       | 8,990  |
| 6                | Parkinson's disease, secondary                                    | 305       | 7,865  |
| 7                | Immunologic deficiency syndromes                                  | 289       | 7,183  |
| 8                | Tauopathies                                                       | 288       | 7,455  |
| 9                | Hereditary degenerative disorders, nervous system                 | 247       | 6,644  |
| 10               | Attenuated familial adenomatous polyposis                         | 236       | 6,074  |
| <i>Cluster 3</i> |                                                                   |           |        |
| 1                | Alzheimer's disease                                               | 2,887     | 32,223 |
| 2                | Mitochondrial dysfunction                                         | 2,172     | 28,804 |
| 3                | Neurodegenerative diseases                                        | 1,935     | 29,500 |
| 4                | Nerve degeneration                                                | 1,305     | 24,828 |
| 5                | Cognition disorders                                               | 1,263     | 24,343 |
| 6                | Dementia                                                          | 1,035     | 21,351 |
| 7                | Neurotoxicity syndromes                                           | 978       | 19,801 |
| 8                | Memory disorders                                                  | 758       | 17,072 |
| 9                | Metabolic diseases                                                | 524       | 12,325 |
| 10               | Learning disabilities                                             | 254       | 6,416  |
| <i>Cluster 4</i> |                                                                   |           |        |
| 1                | Mental disorders                                                  | 438       | 11,181 |
| 2                | Adjustment disorders                                              | 352       | 9,201  |
| 3                | Seizures                                                          | 154       | 4,203  |
| 4                | Schizophrenia                                                     | 108       | 2,709  |
| 5                | Intellectual disability                                           | 74        | 1,873  |
| 6                | Anxiety disorders                                                 | 70        | 1,651  |
| 7                | Amnesia                                                           | 69        | 1,795  |
| 8                | Ataxia telangiectasia                                             | 59        | 1,266  |
| 9                | Bipolar disorder                                                  | 59        | 1,535  |
| 10               | Developmental disabilities                                        | 59        | 1,587  |

**Supplementary Table 3. All drugs or molecules from 5,146 publications.**

| Drugs or molecules |              |                |                  |
|--------------------|--------------|----------------|------------------|
| Curcumin           | Nitric oxide | Acetylcholine  | Nutraceuticals   |
| Insulin            | Metformin    | Cholesterol    | Zinc             |
| Melatonin          | Donepezil    | Phytochemicals | Huperzine A      |
| Iron               | Polyphenols  | Coenzyme Q10   | Hydrogen sulfide |
| Glutamate          | BDNF         | l-carnitine    | Cardiolipin      |
| Glutathione        | Flavonoids   | Memantine      | Copper           |
| Resveratrol        | Sirtuins     | Methylene blue | NAD (+)          |
